# Supplementary material
Source: PubMed Central journal article supplement (PMC9993185)
Supplement: jama-e231084-s004.pdf [file jama-e231084-s004.pdf]

## Data Sharing Statement

### Data

**Data available:** Yes

**Data types:** Participant data with identifiers

**How to access data:** Contact Minhu Chen via [chenminhu@mail.sysu.edu.cn](mailto:chenminhu@mail.sysu.edu.cn) for the data

**When available:** With publication

### Supporting Documents

**Document types:** None

### Additional Information

**Who can access the data:** Contact Minhu Chen via [chenminhu@mail.sysu.edu.cn](mailto:chenminhu@mail.sysu.edu.cn) for the data

**Types of analyses:** Systematic review or meta-analysis

**Mechanisms of data availability:** with a signed data access agreement
